# Supplementary material for: 3D printing aqueous Ti3C2Tx inks for MXene-based energy devices
Source: Royal Society of Chemistry journal article supplement (doi:10.1039/d3ma00096f), 2023-01-01
Supplement: d3ma00096f1.pdf [file d3ma00096f1.pdf]

1  
2  
3 **Supporting Information for**

4 **3D Printing Aqueous  $Ti_3C_2T_x$  Inks for MXene-based Energy Devices**

5 Mofetoluwa Fagade<sup>a,†</sup>, Dhanush Patil<sup>b,†</sup>, Sri Vaishnavi Thummalapalli<sup>b</sup>, Sayli Jambhulkar<sup>b</sup>, Dharneedar Ravichandran<sup>b</sup>, Arunachala  
6 M. Kannan<sup>c</sup>, and Kenan Song<sup>d,\*</sup>

7 <sup>a</sup> Mechanical Engineering, The School for Engineering of Matter, Transport and Energy (SEMTE), Ira A. Fulton Schools of  
8 Engineering, Arizona State University, Tempe, AZ, USA 85281

9 <sup>b</sup> Systems Engineering, The School of Manufacturing Systems and Networks (MSN), Ira A. Fulton Schools of Engineering, Arizona  
10 State University (ASU), Mesa, AZ, USA 85212

11 <sup>c</sup> The Fuel Cell Laboratory, The Polytechnic School, Ira A. Fulton Schools of Engineering, Arizona State University, AZ USA, 85212

12 <sup>d</sup> Associate Professor of Mechanical Engineering at University of Georgia (UGA) and adjunct professor of Manufacturing  
13 Engineering, The School of Manufacturing Systems and Networks (MSN), Ira A. Fulton Schools of Engineering, Arizona State  
14 University, Mesa, AZ, USA 85212;

15 <sup>†</sup> Co-first authors

16 <sup>\*</sup> Corresponding author, Email: [kenan.song@uga.edu](mailto:kenan.song@uga.edu)

17  
18

19 Table of Contents

20 **1. Synthesis of MAX phase:..... 3**

21 **2. Synthesis of MXenes: ..... 4**

22 **3. MAX and MXene Characterizations:..... 6**

23 **4. Ink preparation and rheology: ..... 7**

24 **4.1. Preparation of Aqueous  $Ti_3C_2T_x$  Inks:.....7**

25 **4.2.  $Ti_3C_2T_x$  Ink Characterizations: .....7**

26 **5. Direct Ink Writing of  $Ti_3C_2T_x$  Inks: ..... 8**

27 **6.1. A comparison of the electrical conductivity across various examples of MXene inks.....9**

28 **6.2. MXene-based Interdigitated Capacitor.....9**

29 **6.3. Change in resistance with increasing strain. ....9**

30 **7. The stretchability of the device: ..... 10**

31 **8. Electrochemical Characterization of  $Ti_3C_2T_x$  Coated Electrode: ..... 11**

32 **References..... 12**

33

34

35

36

37 **1. Synthesis of MAX phase:**

38  $\text{Ti}_3\text{AlC}_2$  MAX phase was synthesized by crushing and cold-welding Titanium Carbide (TiC) (i.e., avg. particle size  $\sim 2$  mm,  
39 99.5 % purity), Aluminium (Al) (i.e., avg. particle size  $\sim 325$  mesh, 99.5 % purity), and Titanium (Ti) (i.e., avg. particle size  
40  $\sim 325$  mesh, 99.5 % purity) in a 2:1.1:1 molar ratio.<sup>1</sup> All powders were purchased from Alfa Aesar. The milling process  
41 was carried out in a glovebox (VTI Universal, Gloucester, MA, U.S.) in an argon-purged environment to prevent oxidation  
42 of the elemental powders. The homogeneous mixture was sintered under a uniform argon flow in a tube furnace. The  
43 temperature was ramped at a rate of  $5^\circ\text{C}/\text{min}$  to a maximum of  $1350^\circ\text{C}$ , which was then maintained for 2 h. The loosely  
44 packed powders agglomerated and coalesced in the form of rigid, chalky flakes, which were crushed and sieved to form  
45 uniform  $\text{Ti}_3\text{AlC}_2$  MAX phase powder ( $\sim 38\ \mu\text{m}$  particle size).  
46

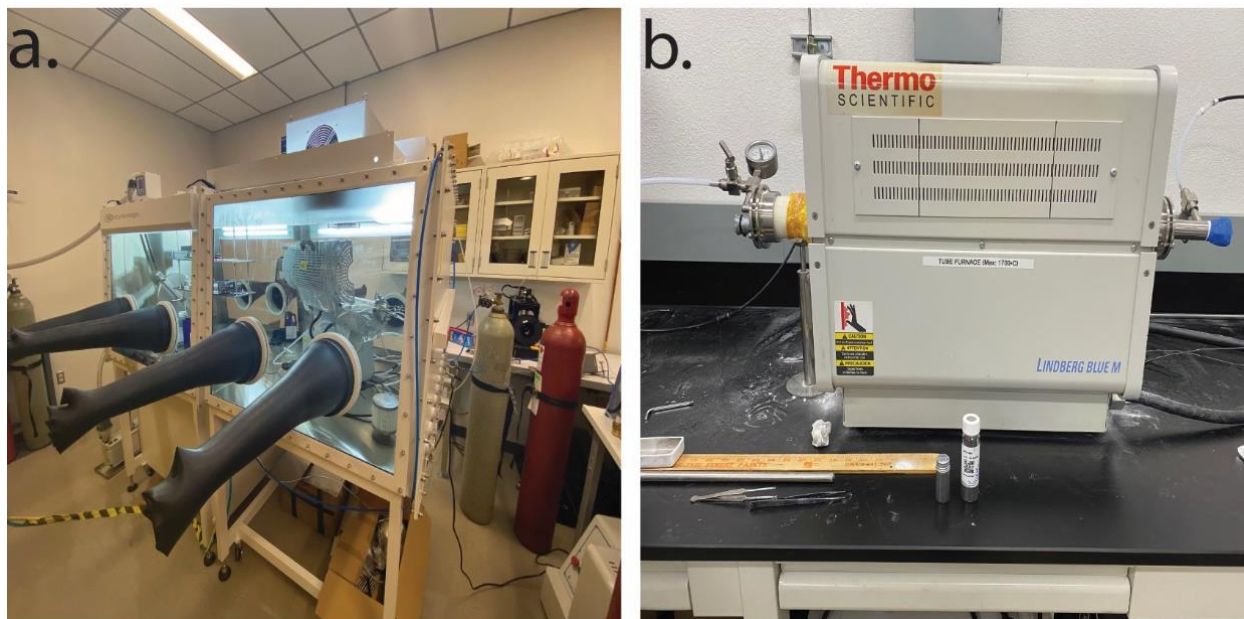

47 **Figure S1.** Experimental setup utilized for  $\text{Ti}_3\text{AlC}_2$  synthesis. a) VTI Glovebox is employed to provide an inert environment  
48 (Argon gas kept at constant pressure) during the crushing and grinding of elemental powders (i.e., Titanium, Aluminum,  
49 and Titanium Carbide). b) ThermoScientific tube furnace used to carry out pressureless-sintering (PS)<sup>2</sup> of powders to  
50 produce the MAX phase. Temperatures reached a maximum of  $1350^\circ\text{C}$  under constant argon flow.  
51  
52

53 **2. Synthesis of MXenes:**

54  $Ti_3C_2T_x$  MXene particles were derived from its  $Ti_3AlC_2$  precursor using the in-situ HF etching method.<sup>1,3</sup> Before the  
55 etching, 74.7 mL of 12 M HCl was diluted in 100 mL of deionized (DI) water to form 9 M HCl. Then, 0.8 g of HCl was  
56 slowly added to 10 mL of 9 M HCl to avoid flashback from a resulting exothermic reaction. The solution was then  
57 magnetically stirred at a constant rate of 500 rpm for 10 min to create a homogeneous mixture.<sup>1</sup> Afterwards, 1 g of  
58  $Ti_3AlC_2$  was then gradually added to the premixed etchant mixture (i.e., LiF + HCl), and the mixture was stirred  
59 continuously for 24 h at a temperature of 35 °C and 500 rpm.<sup>1</sup> Once the etching was complete, the synthesized mixture  
60 was washed repeatedly with DI water until the pH of the supernatant reached a neutral value of ~6. The residue was  
61 then re-dispersed to form an aqueous colloidal solution. To delaminate the multi-layered  $Ti_3C_2T_x$ , the solution was then  
62 hand-shaken and centrifuged at 3500 rpm for 10 min.<sup>1</sup> Subsequently, a greenish-black stable dispersion formed, and  
63 the single-layer sheets were separated from their multi-layered counterparts, which settled at the bottom. The  
64 supernatant was then collected and vacuum-filtered through a PVDF membrane (i.e., 0.22  $\mu m$  pore size, Durapore,  
65 Millipore) to form a thin film stored at low temperatures.  
66

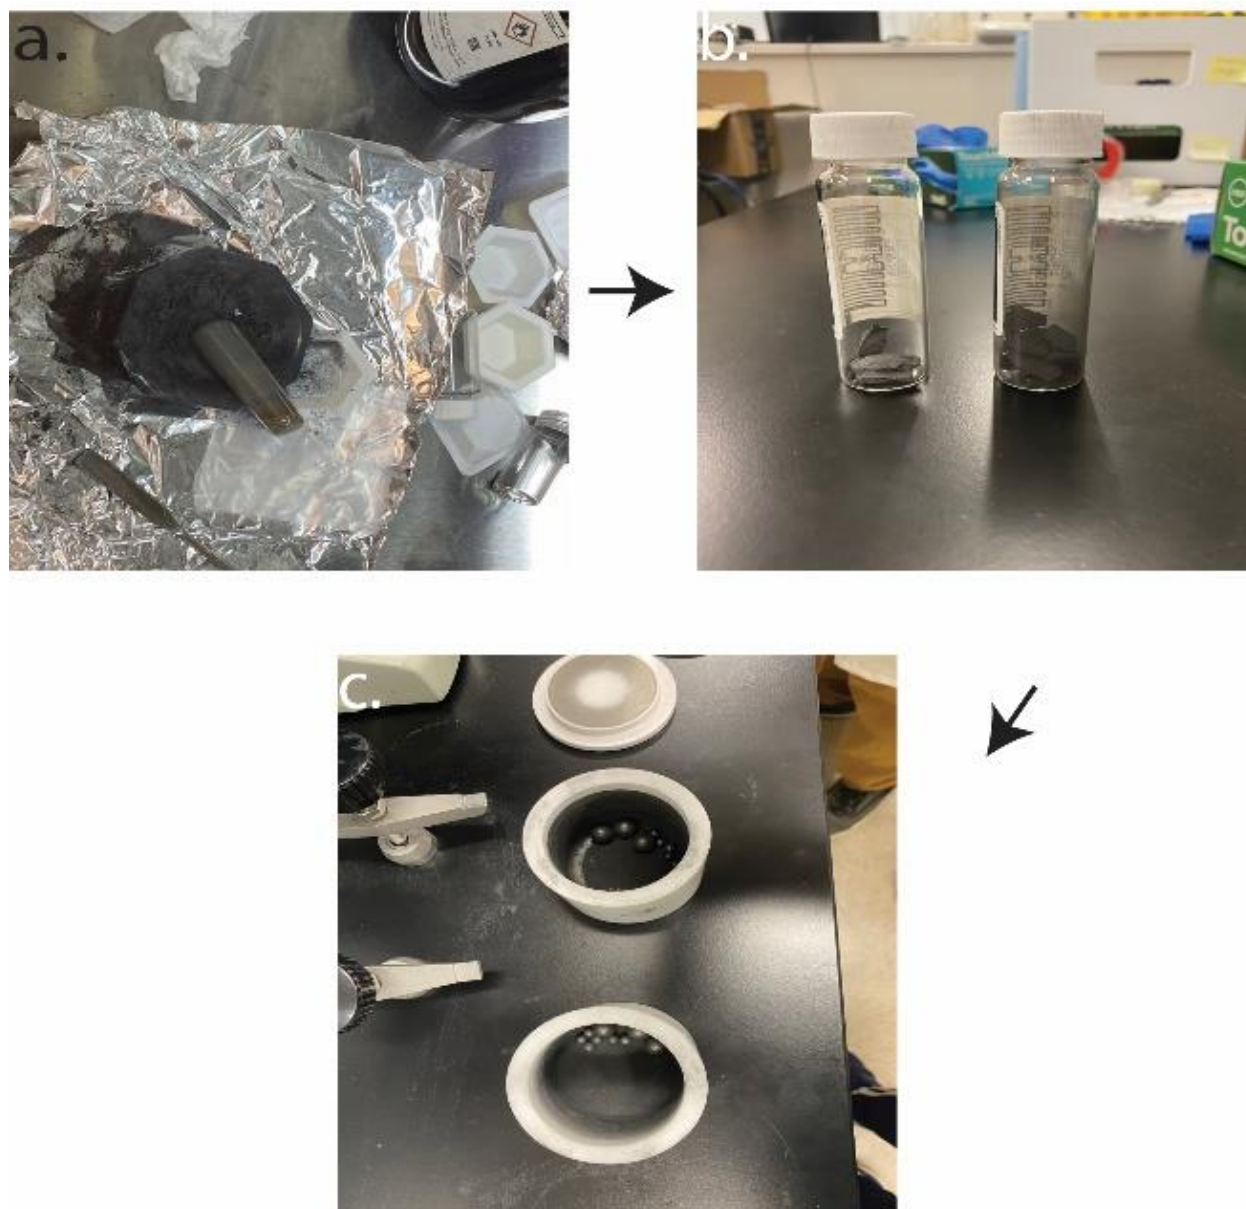

67 **Figure S2.** Different stages of MAX phase production. a) During grinding and cold welding in the glove box. b) Sintered  
68  $Ti_3AlC_2$  flakes after heat treatment. c) Ground powder after milling process in planetary ball mill.  
69  
70

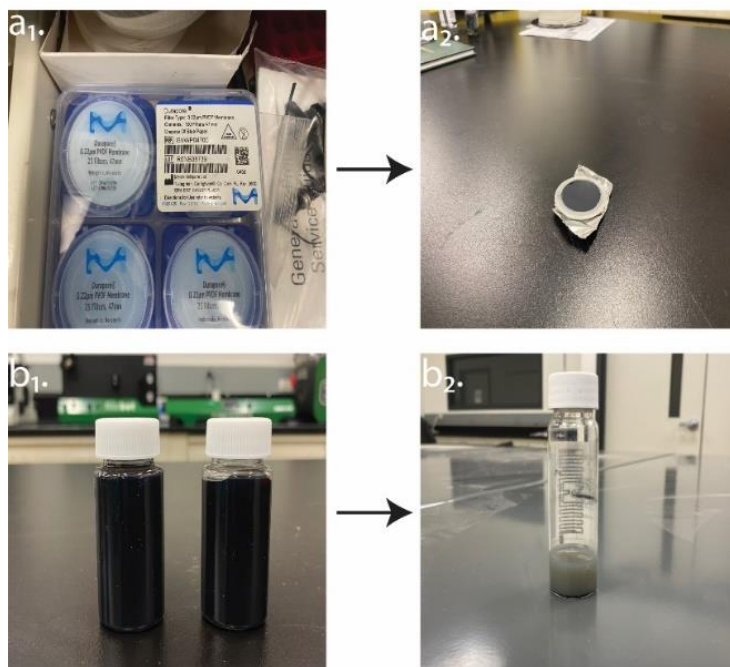

71  
 72 **Figure S3.** Distinct forms of MXenes were produced during the synthesis procedure. a<sub>1</sub>) Filtration membrane used to  
 73 produce the vacuum-assisted filtered film of MXene. a<sub>2</sub>) Vacuum-assisted film of MXene. b<sub>1</sub>) Aqueous colloidal  $Ti_3C_2T_x$   
 74 ink solutions, which, when aged, decolorized to form b<sub>2</sub>).  
 75

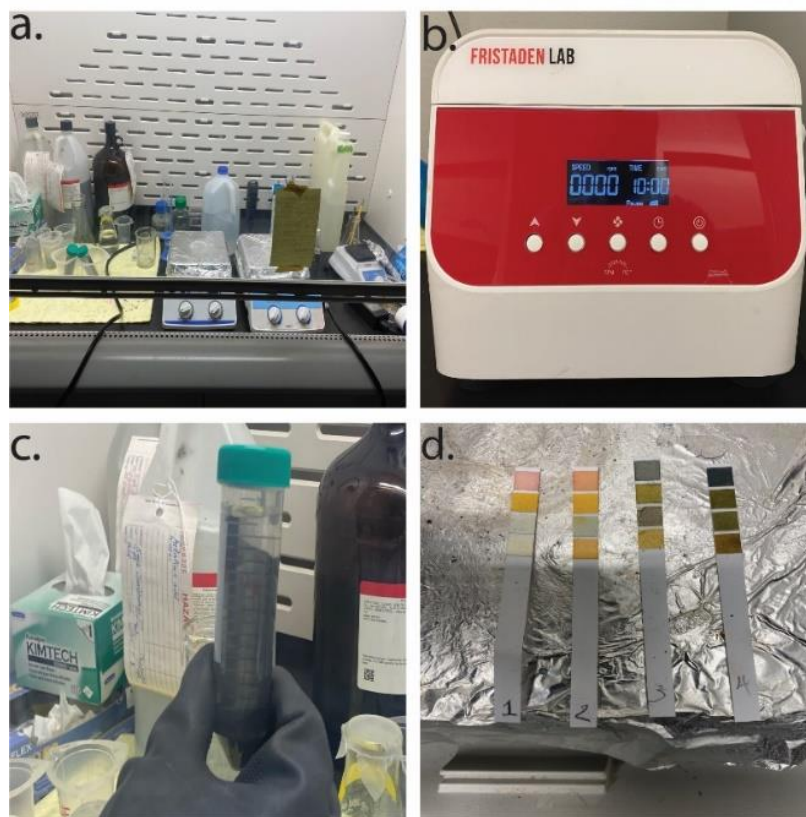

76  
 77 **Figure S4.** Experimental setup used to etch  $Ti_3AlC_2$  and produce  $Ti_3C_2T_x$ . a) Fume hood containing LiF and HCl are utilized  
 78 to create in-situ HF. b) Fristadenlab centrifuge used for washing cycles with DI water to reduce the pH of etched MXene.  
 79 c) 30 mL vial containing  $Ti_3C_2T_x$  slurry after a washing cycle. d) Litmus papers are used to analyze the pH of the aqueous  
 80 solution after every washing cycle.

81           **3. MAX and MXene Characterizations:**

82           The microstructure and morphology of the MAX phase powders and MXene flakes were investigated using the scanning  
83           electron microscopy (SEM) (Zeiss Auriga) technique. Further analyses on the materials' internal phase structure and  
84           crystallography were performed using the X-ray diffraction (XRD) (PANalytical X'Pert PRO MRD) method. The spectra  
85           patterns were analyzed in an  $8 - 70^\circ$  ( $2\theta$ ) span. Tapping atomic force microscopy (AFM) (Witec Alpha 300 RA+) mode  
86           was utilized to visualize the surface topography of the delaminated MXene samples while providing high-resolution  
87           images (up to 0.5 nm).  
88



89 **4. Ink preparation and rheology:**

90 4.1. Preparation of Aqueous  $Ti_3C_2T_x$  Inks:

91 Isopropyl alcohol (IPA) and methylbenzene (toluene) were combined in the volumetric ratio (2.25:1) to form the  
92 antisolvent solution.<sup>4</sup> Then, the MXene/DI water slurry derived from post-washing cycles was added to the IPA/toluene  
93 solution. This was then centrifuged at 7800 rpm for 10 min and vacuum dried at room temperature until the solvent  
94 was evaporated entirely, leaving behind the sedimented MXene.<sup>4</sup> Later, this known amount of sediment was re-  
95 dispersed in DI water to obtain the required concentrations and sonicated for 8 h to create viscous  $Ti_3C_2T_x$  ink.<sup>4</sup> This step  
96 was carried out to ensure the right concentration of MXene ink.

97  
98 4.2.  $Ti_3C_2T_x$  Ink Characterizations:

99 Rheology of the fabricated aqueous  $Ti_3C_2T_x$  inks was performed on a Discovery HR-2 hybrid rheometer (TA Instruments,  
100 DE) with an 8 mm parallel plate, ETC Aluminum system (gap = 50  $\mu m$ , amount  $\approx$  0.25 mL). The viscosity of the inks was  
101 then analyzed against the shear rate in the range of 0.1-1000  $s^{-1}$ . The viscoelastic behavior constituting the elastic ( $G'$ )  
102 and viscous ( $G''$ ) moduli of the MXene dispersion have been determined as a function of angular frequency in the range  
103 of 0.1 – 100 rad/s at a constant strain % of 1.0 %.  
104

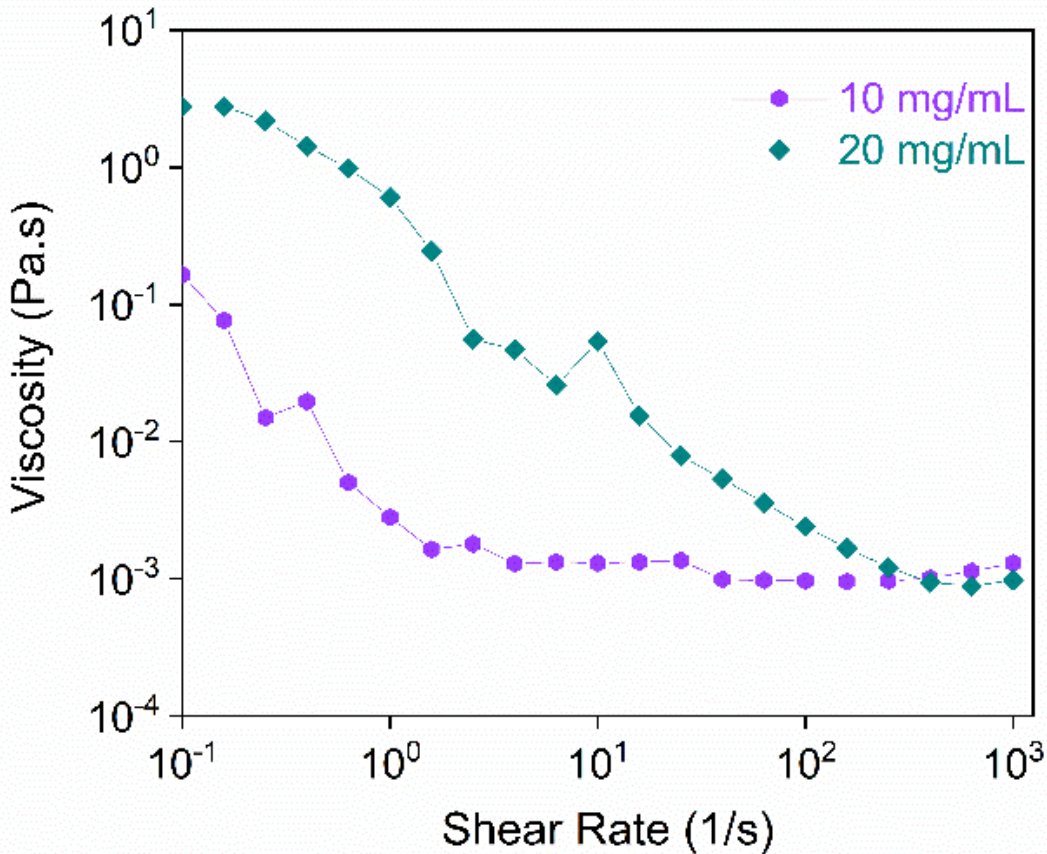

105 **Figure S5.** Flow sweep rheology analyzing viscosity behavior with the increasing shear rate for the low-concentration  
106 inks  
107  
108

109 **5. Direct Ink Writing of  $Ti_3C_2T_x$  Inks:**

110 A Hyrel 3D Hydra system was utilized for direct ink writing (DIW) of the ink solutions (i.e., 100 mg mL<sup>-1</sup> and 200 mg mL<sup>-1</sup>). The aqueous dispersions were loaded into a 10-cc syringe (AHS, USA) and attached to a motorized fluid dispensing pump system (KD Scientific LEGATO 200). The pulse was set at a rate of 0.075 mL min<sup>-1</sup>, and  $Ti_3C_2T_x$  ink was used to form various (e.g., straight line or zigzag) surface patterns.

114

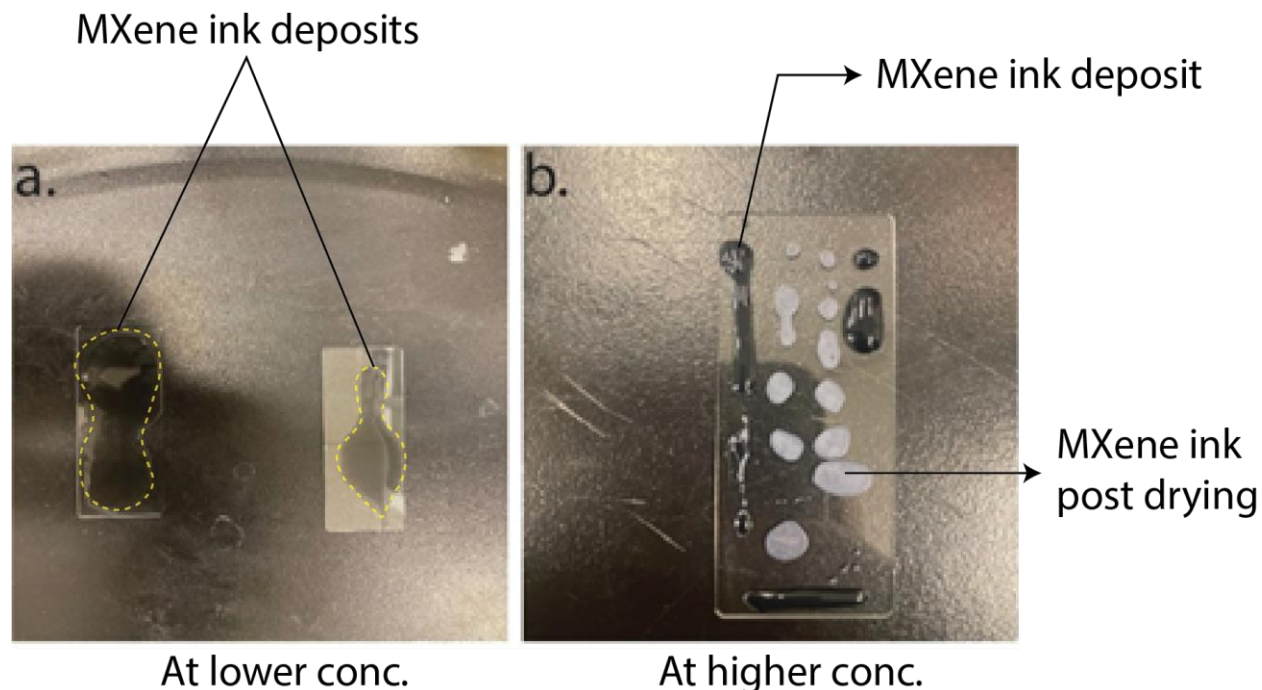

115 **Figure S6.** Early trials analyze the effects of parameters on flow behavior. a) Initial deposition on a glass  
116 substrate with 10 mg mL<sup>-1</sup> aqueous MXene solution. b) Improved deposition on a glass substrate with  
117 higher concentrations of  $Ti_3C_2T_x$  content.

118  
119  
120



121  
122

**6. Electrical performance of  $Ti_3C_2Tx$ :**

6.1. A comparison of the electrical conductivity across various examples of MXene inks.

| MXene ink                    | Concentration        | Conductivity (S/cm) | Fabrication method    | Post-processing                        | Reference |
|------------------------------|----------------------|---------------------|-----------------------|----------------------------------------|-----------|
| Aqueous- $Ti_3C_2Tx$         | 22.4 mg/mL           | 450                 | Inkjet printing       |                                        | 6         |
| $Ti_3C_2Tx$ – in – Water     | 30 mg/mL             | 10                  | Inkjet printing       | Dried @ RT                             | 7         |
| $Ti_3C_2Tx$ /ODA             | 20 mg/mL             | 8.74                | Extrusion 3D printing | Annealing                              | 8         |
| $Ti_3C_2Tx$ /AlOOH           | 104.6 mg/mL          | 532.3               | Extrusion 3D printing | Freeze drying                          | 9         |
| Aqueous- $Ti_3C_2Tx$ /PH1000 | 30 mg/mL             | 615                 | Inkjet printing       |                                        | 10        |
| Aqueous- $Ti_3C_2Tx$         | 50 mg/mL             |                     | Extrusion 3D printing | Freeze drying                          | 11        |
| Aqueous-MXene/rGO            | 70 % (MXene loading) | 1013                | Extrusion 3D printing | Freeze drying, Annealing               | 12        |
| PEDOT: PSS/ $Ti_3C_2Tx$      | 120 mg/mL            | 1073                | Extrusion 3D printing | Freezing 3D printing                   | 13        |
| HA-5/Alg-1/ $Ti_3C_2$        | 1 mg/mL<br>5 mg/mL   | 0.0055<br>0.0072    | Extrusion 3D printing | Crosslinking (CaCl <sub>2</sub> )      | 14        |
| Aqueous $Ti_3C_2Tx$          | 300 mg/mL            |                     | Extrusion 3D printing | Freeze-dried                           | 15        |
| TOCNFs/ $Ti_3C_2$ -50%       | 50 %                 | 2.11                | Extrusion 3D printing | Ethanol coagulation (solvent exchange) | 16        |
| $Ti_3C_2$ /PEDOT: PSS        | 80 %<br>Pure         | 1600<br>4000        | Extrusion 3D printing | Dried overnight @ 60°C                 | 17        |
| Aqueous- $Ti_3C_2Tx$         | 100 mg/mL            | 1500                | Extrusion 3D printing | Drying @ RT                            | This work |

123 **Table S1.** Compares the electrical conductivities of different MXene-based inks concerning their concentration.

124 6.2. MXene-based Interdigitated Capacitor.

125 The 100 mg mL<sup>-1</sup> MXene ink was deposited on PVA coated glass slide to fabricate the test samples for capacitive sensing.  
126 Later, copper wires formed connections, realizing an interdigitated capacitor setup. The sample was then encapsulated  
127 in PVA again before being peeled off. The copper wire terminals of the capacitor were connected to the terminals of  
128 the KEITHLEY DMM7510 7 ½ DIGIT MULTIMETER, using which the capacitance was measured. Input parameters were  
129 tap, tap and hold corresponding to short and long instance responses to finger touch.

130 6.3. Change in resistance with increasing strain.

131 A similar sample (100 mg mL<sup>-1</sup>), as mentioned in section 6.2, was prepared, but with zig-zag patterns such that the  
132 conductivity wouldn't be affected at increasing strain due to the close-to serpentine pattern. The sample was clamped  
133 onto the TA Instruments Discovery HR-2's tensile setup. In-situ resistance was measured using the KEITHLEY DMM7510  
134 7 ½ DIGIT MULTIMETER. Tensile loading was programmed at a linear rate of 2 μm s<sup>-1</sup> corresponding to 0.01 – 5 % strain.

135

136 **7. The stretchability of the device:**

137 The printed patterns were sandwiched between PDMS for the MXene-based printed pattern to be sustainable for  
138 twisting and bending. Since PDMS is an elastomer, it has good elasticity, which makes the device conform to mechanical  
139 deformation, making it a good candidate for stretchable sensing.

a.

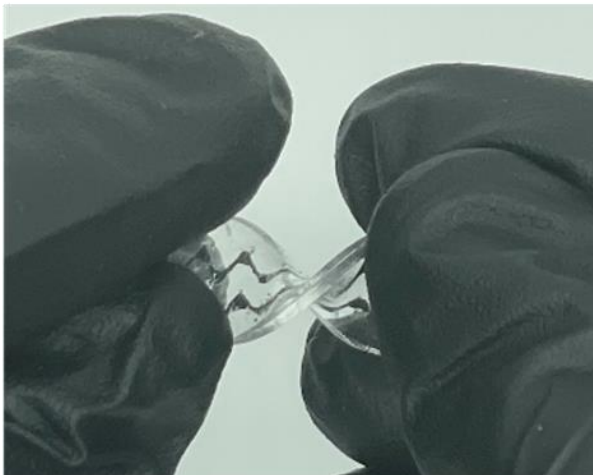

b.

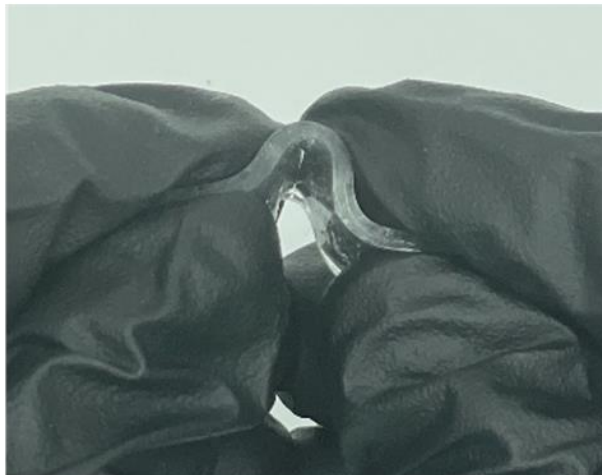

140

141 **Figure S7.** a&b) The printed MXene pattern encapsulated in PDMS is twisted and bent to show stretchability.

142 **8. Electrochemical Characterization of Ti<sub>3</sub>C<sub>2</sub>T<sub>x</sub> Coated Electrode:**

143 A three-electrode cell was designed to conduct the electrochemical test. The MXene (Ti<sub>3</sub>C<sub>2</sub>T<sub>x</sub>) was employed as the  
 144 working electrode, Saturated Calomel Electrode (SCE) was utilized as the counter electrode, and a platinum wire was  
 145 used as the reference electrode.<sup>5</sup> Aqueous alkaline 1 M KOH solution was the electrolyte selected for this test.  
 146 Furthermore, the CV measurements were analyzed using a Parstat 2273 electrochemical system at multiple scan rates  
 147 (i.e., 10, 25, 75, and 100 mV s<sup>-1</sup>) in the potential window (-0.7 to 0.7 V). The test setup was stabilized at a 50 mV s<sup>-1</sup> scan  
 148 rate for 20 cycles. Once stabilized, the sample was run at varying scan rates, each getting two cycles.

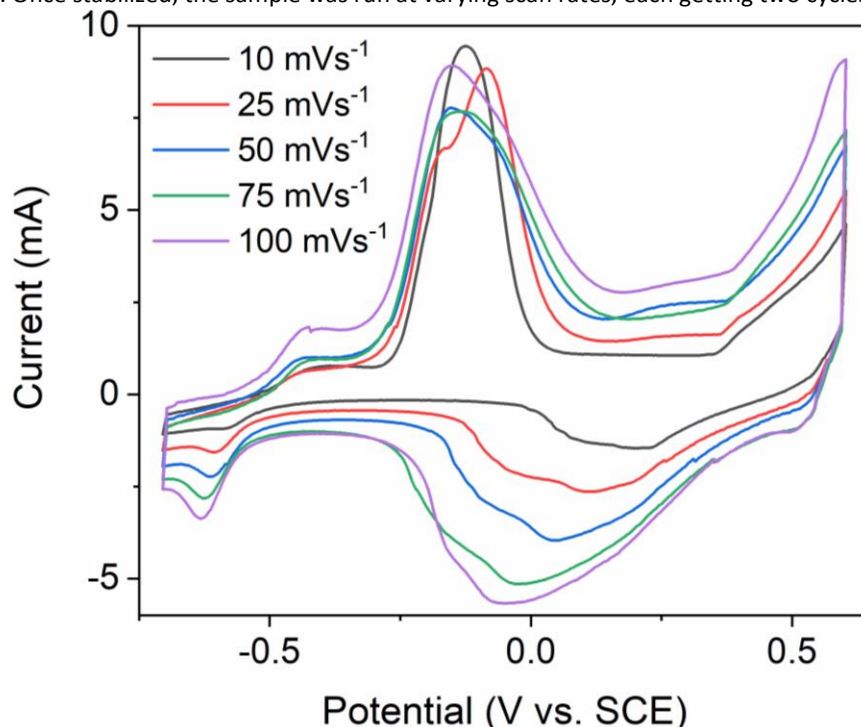

149 **Figure S8.** Cyclic Voltammetry of MXene Ti<sub>3</sub>C<sub>2</sub>T<sub>x</sub> run at different scan rates (10, 25, 50, 75, 100 mVs<sup>-1</sup>) within the potential  
 150 window of -0.7 V to +0.7 V.  
 151

152 A set of cyclic voltammetry (CV) tests was performed to observe the electrochemical behavior of the MXene ink solution.  
 153 To create a rough surface morphology that facilitates ink deposition and prevents agglomeration of the MXene  
 154 nanoparticles, a copper electrode was polished with sandpaper and sonicated in soap solution for about 8 hours. The  
 155 electrode was then cleaned to remove impurities that could affect the experiment's accuracy. A three-electrode system  
 156 used the MXene-coated electrode to produce the anodic and cathodic peaks (**Figure S9**). Different scan rates (10, 25,  
 157 75, and 100 mV s<sup>-1</sup>) were used in the experiment, with the integral area increasing as the scan rate increased.  
 158 Additionally, the current density held by the electrode increased at higher scan rates.

159 The charge storage mechanism of the fabricated electrodes was then observed from cyclic voltammetry (CV) studies.  
 160 The CV curves show the presence of anodic and cathodic peaks for MXene particles. The increase in integral area  
 161 concerning the scan rate indicates the redox peaks slightly shift indicating the lower potential. At high scan rates such  
 162 as 100 mV s<sup>-1</sup>, the ions migration into electrode materials becomes arduous, and less diffusion occurs, resulting in the  
 163 deviation of the CV shape. The increase in scan rate increases the current density. However, the electrode material's  
 164 specific capacitance (C<sub>sp</sub>) value is decreased. The specific capacitance values were calculated from the CV curves.

$$C_{sp} = \frac{\int Idv}{vm\Delta V} \quad (1)$$

165 Where C<sub>sp</sub> is specific capacitance (F g<sup>-1</sup>), 'I' stands for current (A),  $\int Idv$  is the integral area under the CV curve, 'v' is the  
 166 scan rate,  $\Delta V$  is the change in voltage, and 'm' is the active mass loaded on the electrode, respectively. Although the  
 167 integral area for the 100 mV s<sup>-1</sup> scan rate is the largest, the lower scan rate (10 mVs<sup>-1</sup>) possesses the highest specific  
 168 capacitance of 17.15 F g<sup>-1</sup> compared to 4.36 F g<sup>-1</sup> at 100 mV s<sup>-1</sup>.

169 References

170 1 S. Jambhulkar, S. Liu, P. Vala, W. Xu, D. Ravichandran, Y. Zhu, K. Bi, Q. Nian, X. Chen and K. Song,  
171 *ACS Nano*, 2021, **15**, 12057–12068.

172 2 K. Lu, *International Materials Reviews*, 2008, **53**, 21–38.

173 3 W. Y. Chen, X. Jiang, S.-N. Lai, D. Peroulis and L. Stanciu, *Nat Commun*, 2020, **11**, 1302.

174 4 S.-H. Seok, S. Choo, J. Kwak, H. Ju, J.-H. Han, W.-S. Kang, J. Lee, S.-Y. Kim, D. H. Lee, J. Lee, J. Wang,  
175 S. Song, W. Jo, B. M. Jung, H. G. Chae, J. S. Son and S.-Y. Kwon, *Nanoscale Adv*, 2021, **3**, 517–527.

176 5 Y. Zhang, Z. Zhao, C. Luo, X. Wu and W. Chen, *Appl Surf Sci*, 2022, **578**, 152030.

177 6 S. Uzun, M. Schelling, K. Hantanasirisakul, T. S. Mathis, R. Askeland, G. Dion and Y. Gogotsi, *Small*,  
178 2021, **17**, 2006376.

179 7 E. Quain, T. S. Mathis, N. Kurra, K. Maleski, K. L. Van Aken, M. Alhabeab, H. N. Alshareef and Y.  
180 Gogotsi, *Adv Mater Technol*, 2019, **4**, 1800256.

181 8 L. Li, Z. Deng, M. Chen, Z.-Z. Yu, T. P. Russell and H.-B. Zhang, *Nano Lett*, 2023, **23**, 155–162.

182 9 X. Wu, T. Tu, Y. Dai, P. Tang, Y. Zhang, Z. Deng, L. Li, H.-B. Zhang and Z.-Z. Yu, *Nanomicro Lett*, 2021,  
183 **13**, 148.

184 10 J. Ma, S. Zheng, Y. Cao, Y. Zhu, P. Das, H. Wang, Y. Liu, J. Wang, L. Chi, S. (Frank) Liu and Z. Wu, *Adv  
185 Energy Mater*, 2021, **11**, 2100746.

186 11 W. Yang, J. Yang, J. J. Byun, F. P. Moissinac, J. Xu, S. J. Haigh, M. Domingos, M. A. Bissett, R. A. W.  
187 Dryfe and S. Barg, *Advanced Materials*, 2019, **31**, 1902725.

188 12 Y. Dai, X. Wu, L. Li, Y. Zhang, Z. Deng, Z.-Z. Yu and H.-B. Zhang, *J Mater Chem A Mater*, 2022, **10**,  
189 11375–11385.

190 13 L. Li, J. Meng, X. Bao, Y. Huang, X. Yan, H. Qian, C. Zhang and T. Liu, *Adv Energy Mater*, 2023, **13**,  
191 2203683.

192 14 H. Rastin, B. Zhang, A. Mazinani, K. Hassan, J. Bi, T. T. Tung and D. Losic, *Nanoscale*, 2020, **12**,  
193 16069–16080.

194 15 K. Shen, B. Li and S. Yang, *Energy Storage Mater*, 2020, **24**, 670–675.

195 16 W. Cao, C. Ma, D. Mao, J. Zhang, M. Ma and F. Chen, *Adv Funct Mater*, 2019, **29**, 1905898.

196 17 A. Ghaffarkhah, M. Kamkar, Z. A. Dijvejin, H. Riazi, S. Ghaderi, K. Golovin, M. Soroush and M.  
197 Arjmand, *Carbon N Y*, 2022, **191**, 277–289.

198
